# Supplementary material for: Amyloid precursor protein controls cholesterol turnover needed for neuronal activity
Source: PubMed Central journal article supplement (PMC3628100; doi:10.1002/emmm.201202215), 2013-04-02
Supplement: emmm0005-0608-sd2.pdf [file emmm0005-0608-sd2.pdf]

Fig. 1F

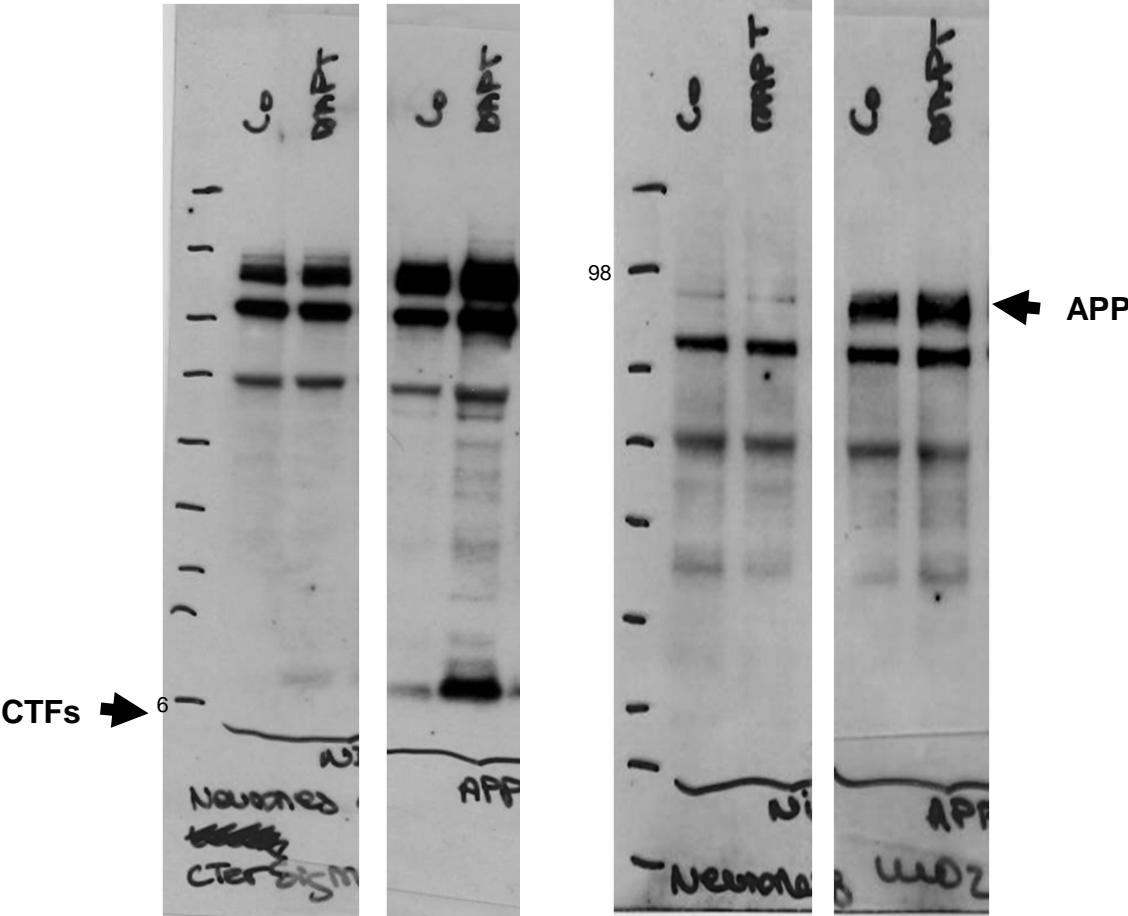

Fig. 1J

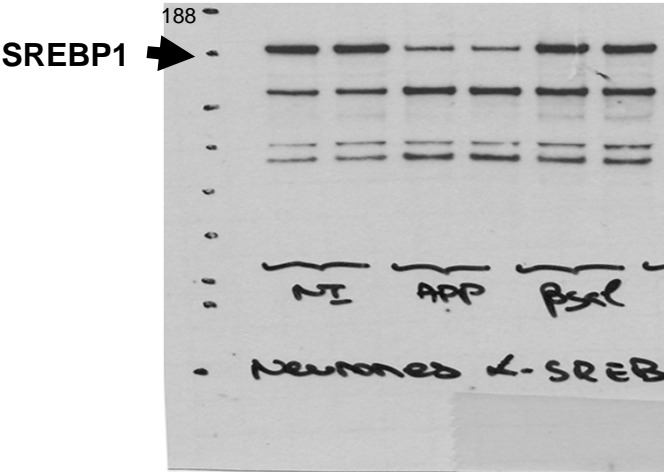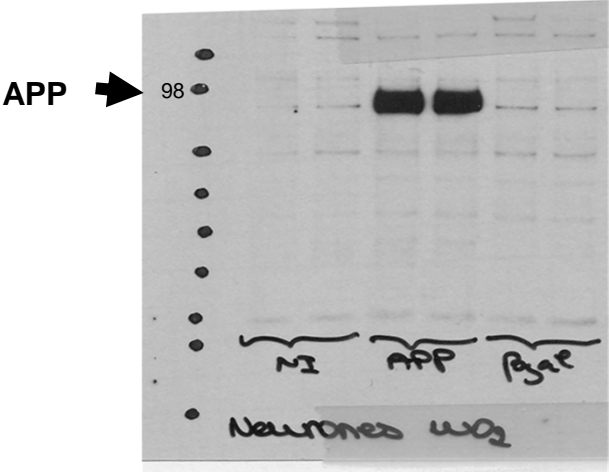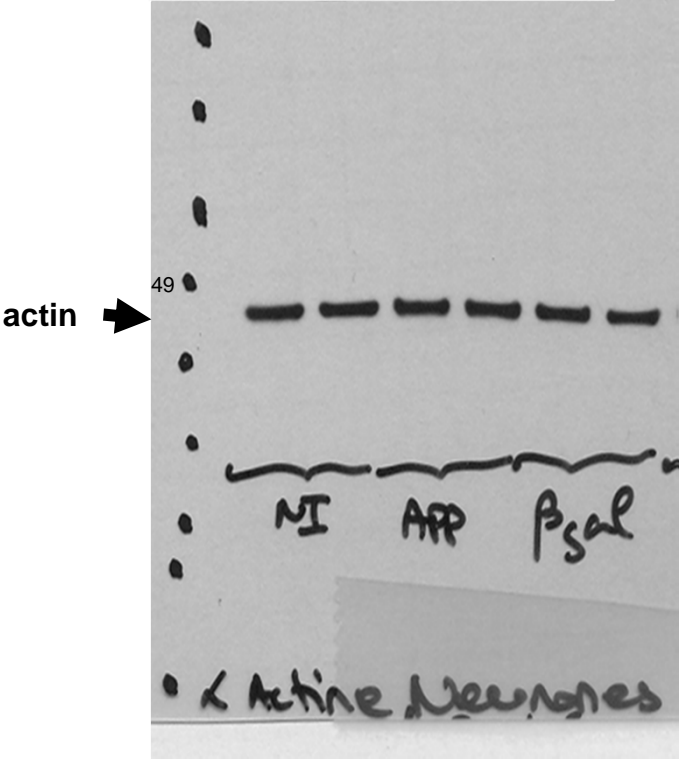

Fig. 1L

SREBP1 → 188

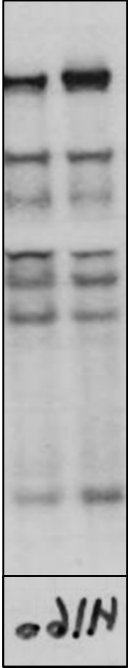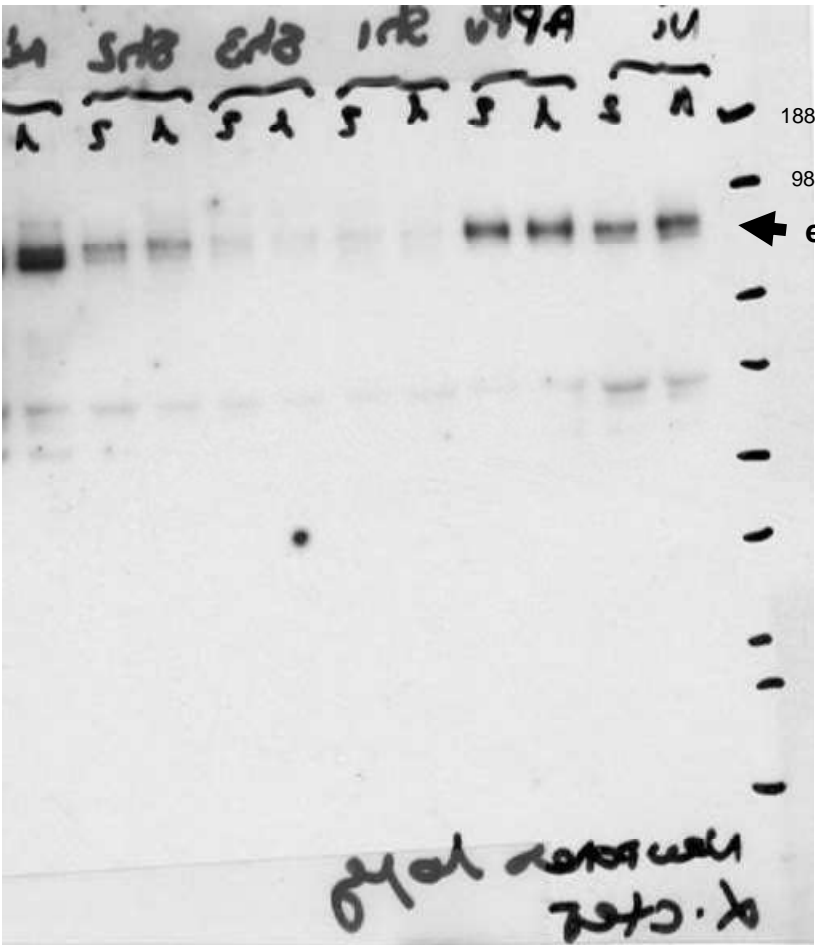

188

98

← endo. APP
