# Supplementary material for: Amyloid precursor protein controls cholesterol turnover needed for neuronal activity
Source: PubMed Central journal article supplement (PMC3628100; doi:10.1002/emmm.201202215), 2013-04-02

Fig. 2A

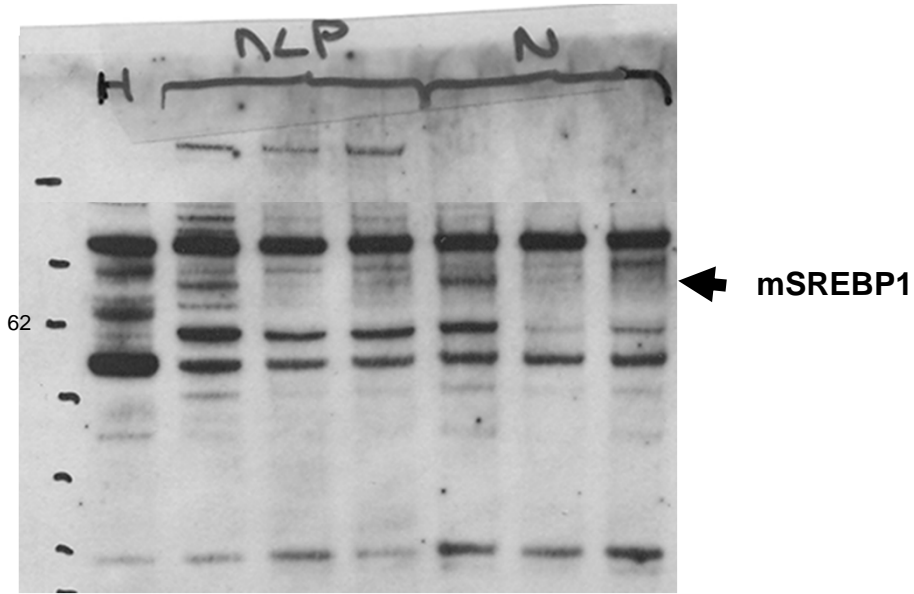

Fig. 2B

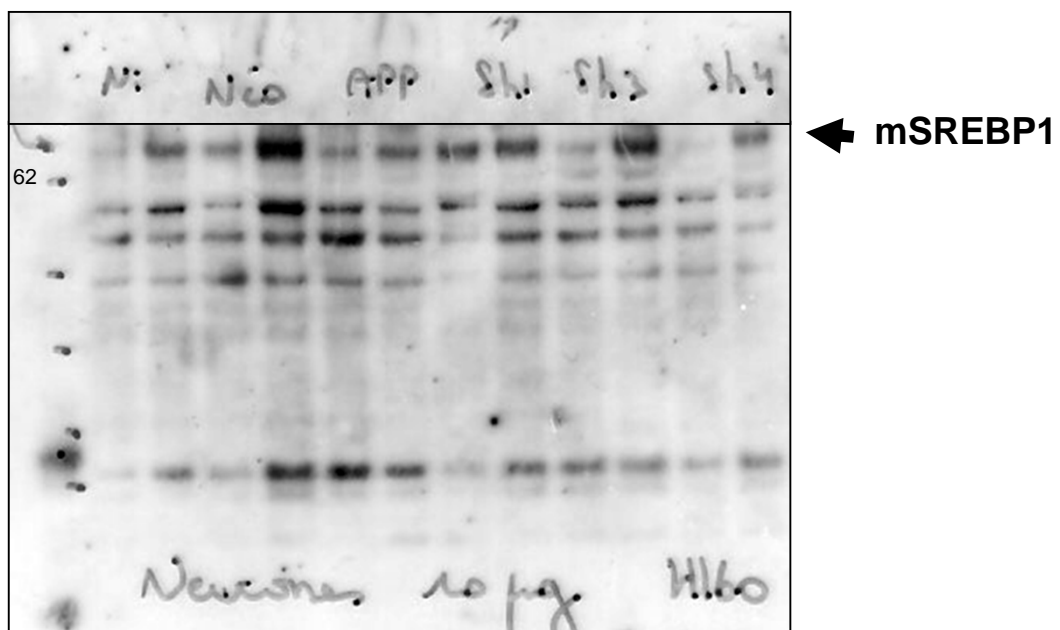

Fig. 2M

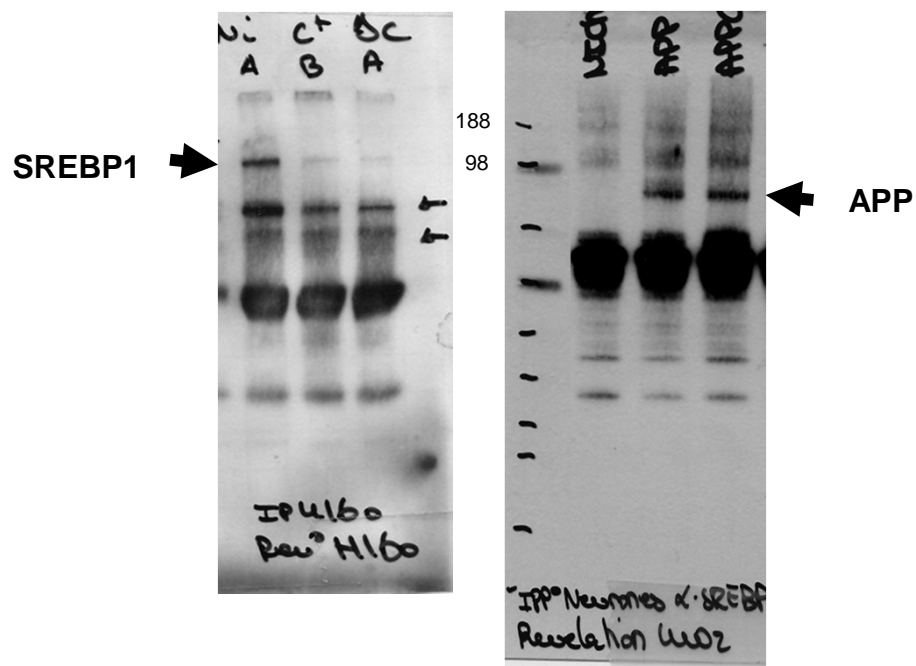

Fig. 20

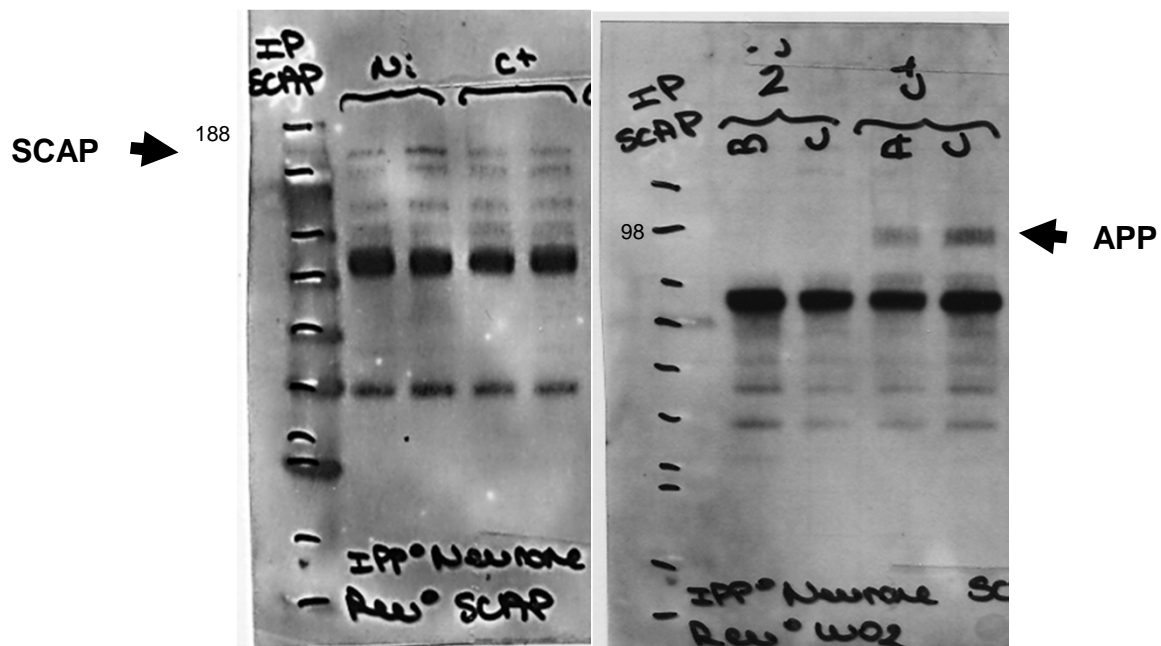

Fig. 2P

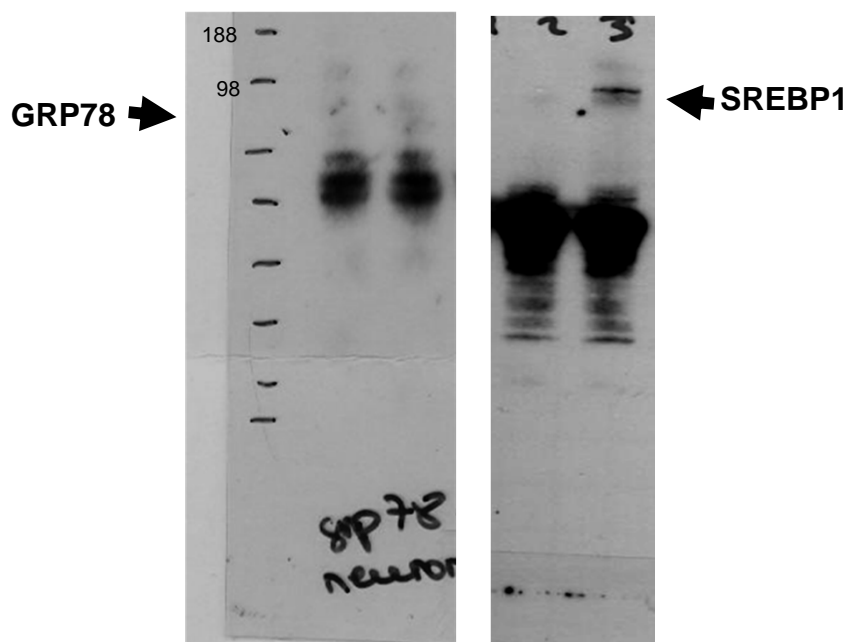

Supplement: emmm0005-0608-sd3.pdf [file emmm0005-0608-sd3.pdf]
