# Supplementary material for: Amyloid precursor protein controls cholesterol turnover needed for neuronal activity
Source: PubMed Central journal article supplement (PMC3628100; doi:10.1002/emmm.201202215), 2013-04-02

Fig. 4B

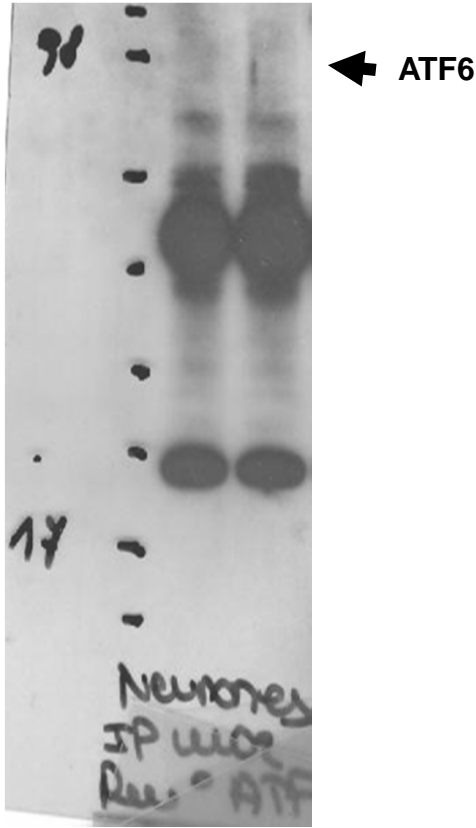

Fig. 4C

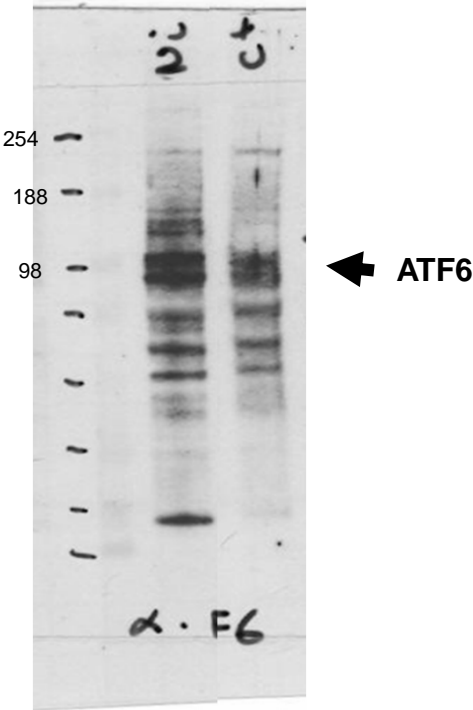

Supplement: emmm0005-0608-sd5.pdf [file emmm0005-0608-sd5.pdf]
