# Supplementary material for: Amyloid precursor protein controls cholesterol turnover needed for neuronal activity
Source: PubMed Central journal article supplement (PMC3628100; doi:10.1002/emmm.201202215), 2013-04-02

Fig. 5D and E

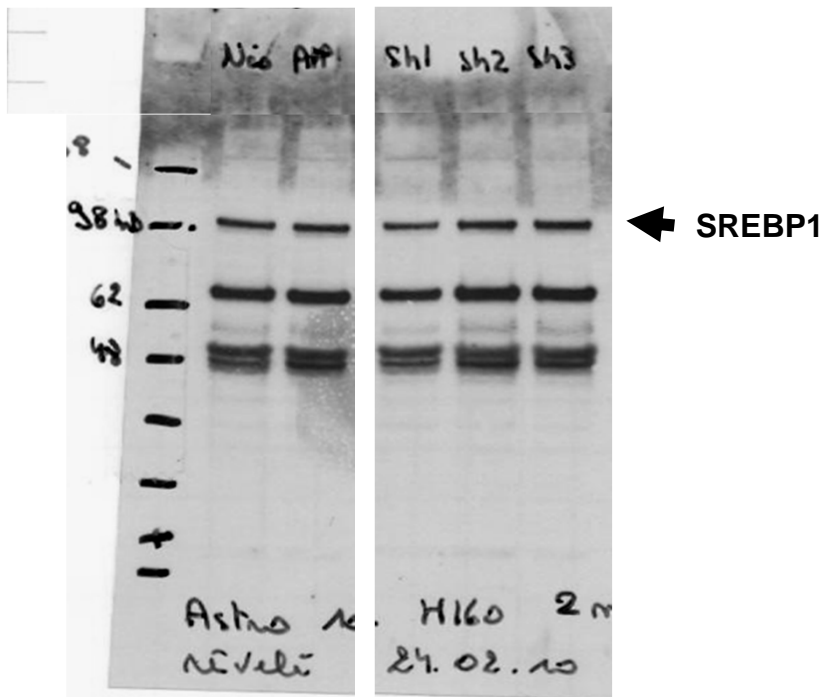

Fig. 5E

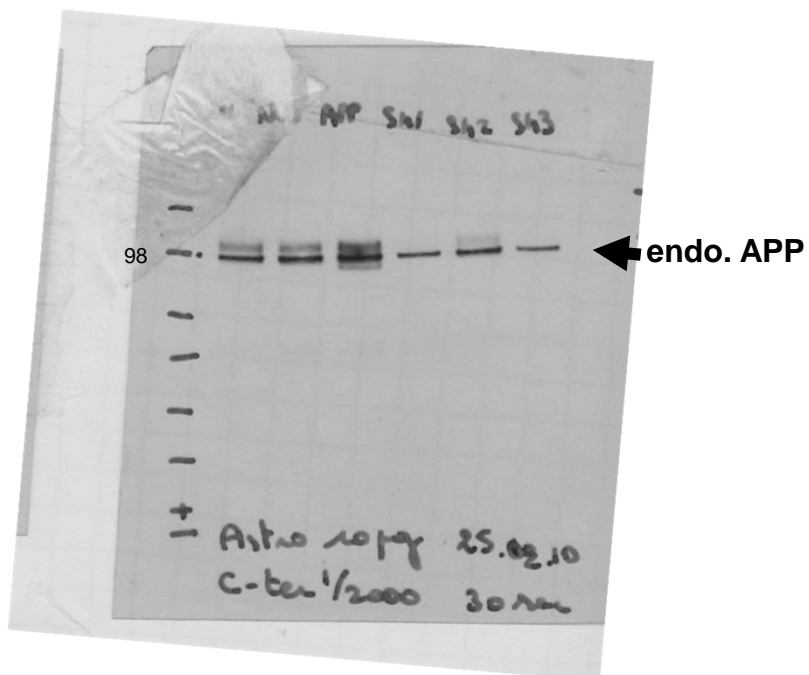

Fig. 5F

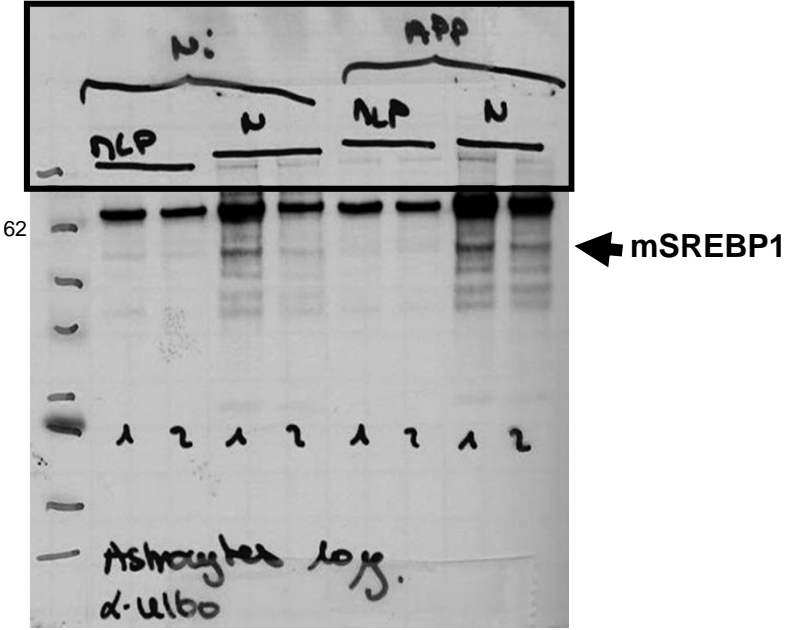

Fig. 5S

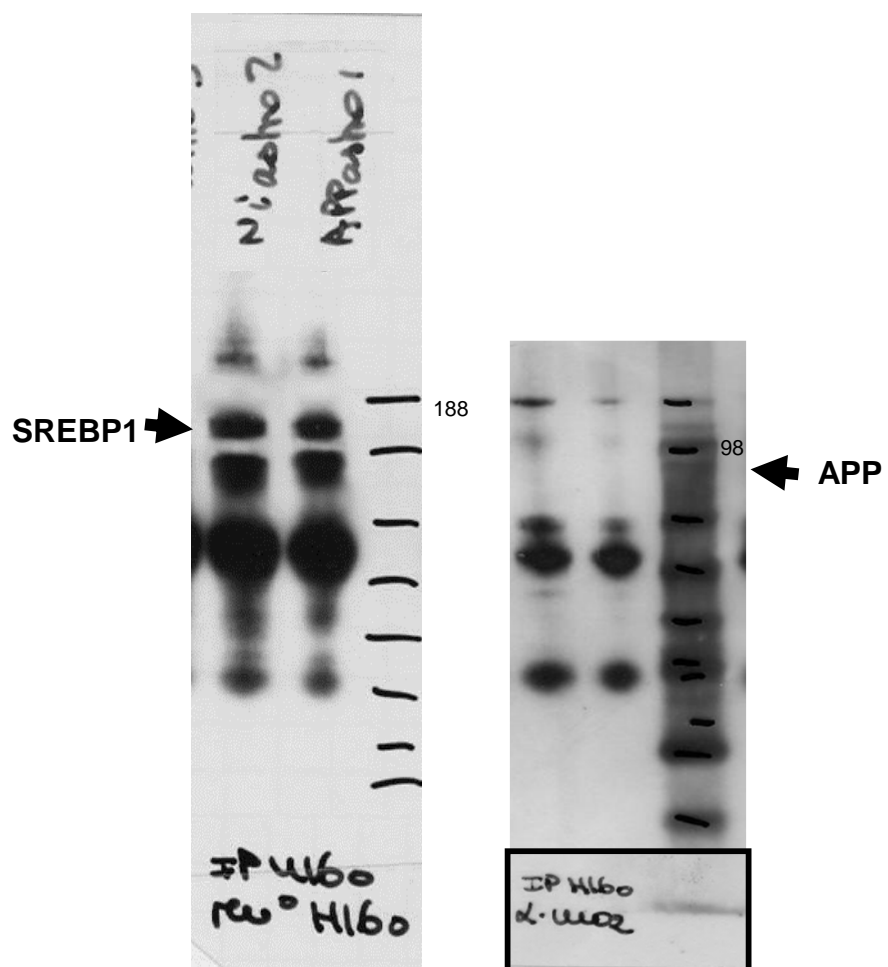

Supplement: emmm0005-0608-sd6.pdf [file emmm0005-0608-sd6.pdf]
