# Supplementary material for: Amyloid precursor protein controls cholesterol turnover needed for neuronal activity
Source: PubMed Central journal article supplement (PMC3628100; doi:10.1002/emmm.201202215), 2013-04-02

Fig. 6A

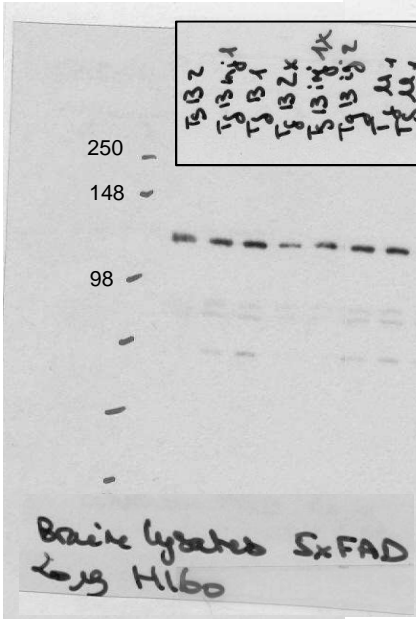

Tris-Glycine gel 8%  
15 pishes 200g

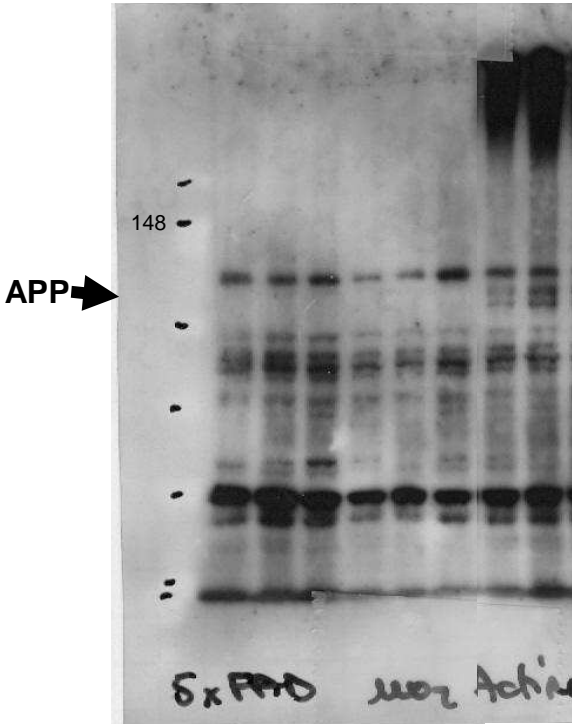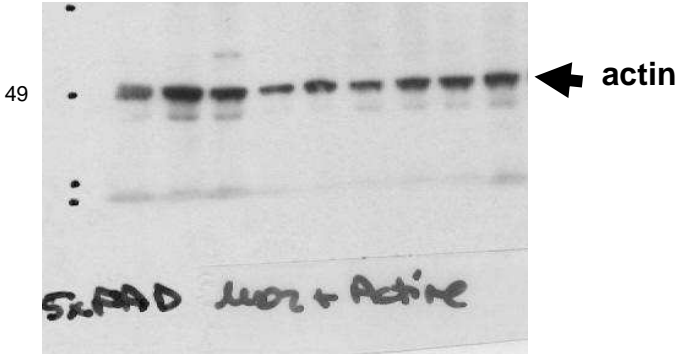

Fig. 6C

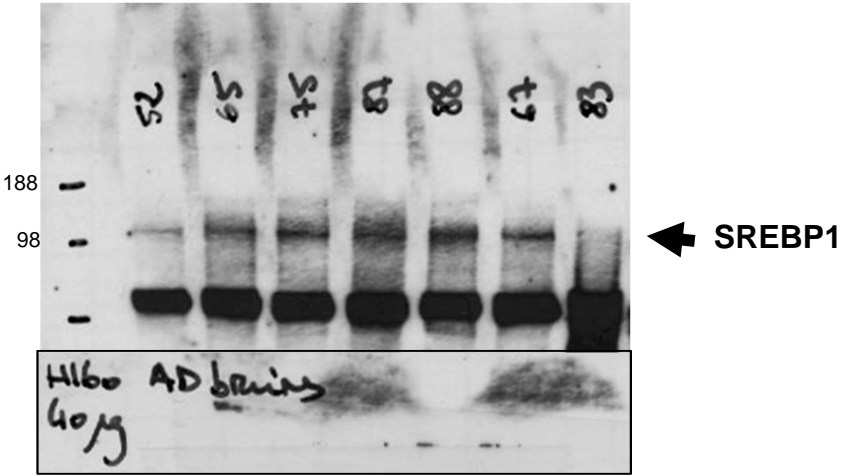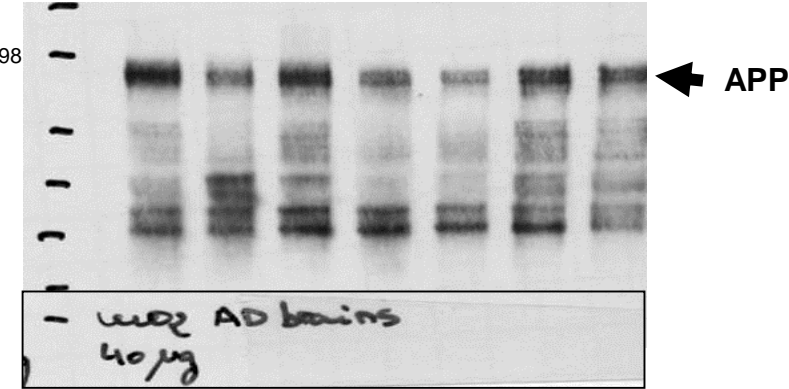

Fig. 6D

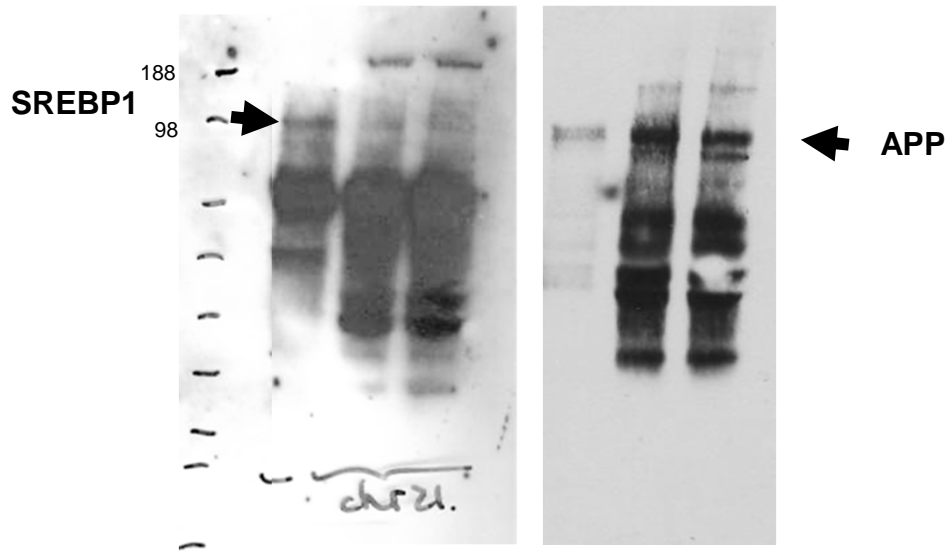

Supplement: emmm0005-0608-sd7.pdf [file emmm0005-0608-sd7.pdf]
