# Supplementary material for: Amyloid precursor protein controls cholesterol turnover needed for neuronal activity
Source: PubMed Central journal article supplement (PMC3628100; doi:10.1002/emmm.201202215), 2013-04-02

Fig. 7G

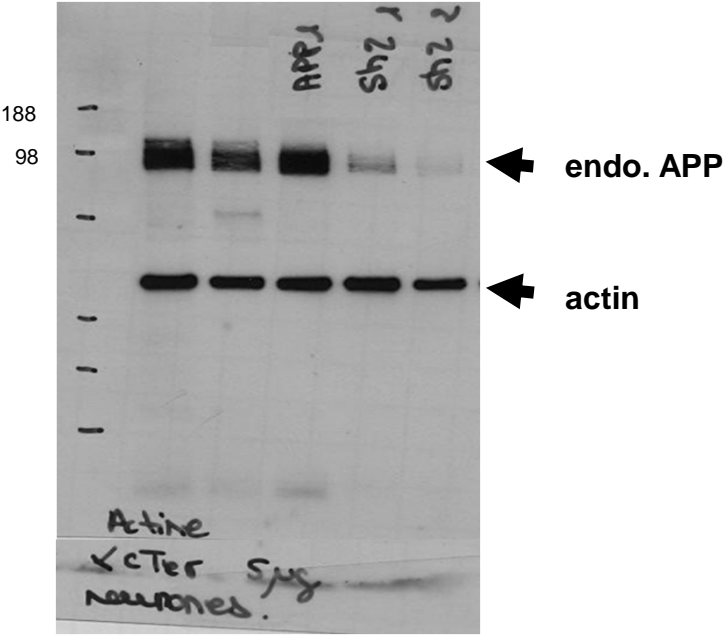

Supplement: emmm0005-0608-sd8.pdf [file emmm0005-0608-sd8.pdf]
