# Supplementary material for: Amyloid precursor protein controls cholesterol turnover needed for neuronal activity
Source: PubMed Central journal article supplement (PMC3628100; doi:10.1002/emmm.201202215), 2013-04-02
Supplement: emmm0005-0608-sd9.pdf [file emmm0005-0608-sd9.pdf]

## **Supporting information**

### **Table of Content:**

- Supplementary figures and legends pages 2-8:
  - o Supporting information Fig.1 page 2
  - o Supporting information Fig.2 page 3
  - o Supporting information Fig.3 page 4
  - o Supporting information Fig.4 page 5
  - o Supporting information Fig.5 page 6
  - o Supporting information Fig.6 page 7
  - o Supporting information Fig.7 page 8
- Supplementary methods pages 9
- Supplementary references page 10

## Supplementary figures

Supporting information Fig.1

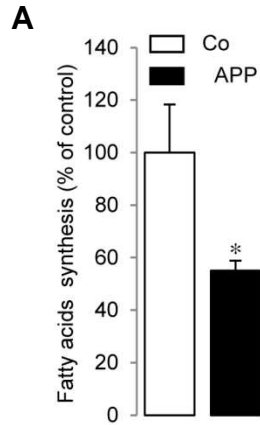

### Supporting information Fig. 1. APP expression decreases fatty acids synthesis.

**A.** Fatty acids synthesis was measured by  $^{14}\text{C}$  acetate incorporation in neurons expressing APP compared to Co (n=4). Unpaired Student's *t* statistical test ( $P = 0.03$ ).

Supporting information Fig.2

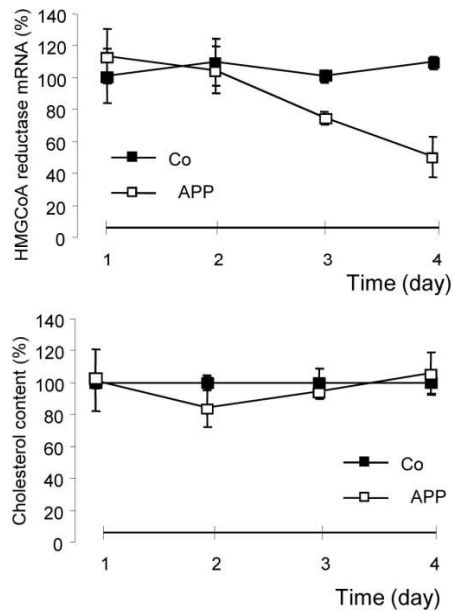

**Supporting information Fig. 2. Decrease of HMG-CoA gene transcription does not result from a transient cholesterol overload in APP expressing neurons.**

Primary rat cortical neurons were infected or not (control, Co) by AdhAPP (APP). HMG-CoA reductase mRNA levels in Co and APP neurons were analysed by qRT-PCR (n=6) from day 1 to day 4 of APP expression (upper panel). Results (mean  $\pm$  SE) are normalized by GAPDH mRNA and expressed as percentage of Co. Cholesterol content (lower panel) in cell membranes (n=6) was measured in Co and APP expressing neurons. Results (mean  $\pm$  SE) are given as percentage of Co neurons.

Supporting information Fig. 3

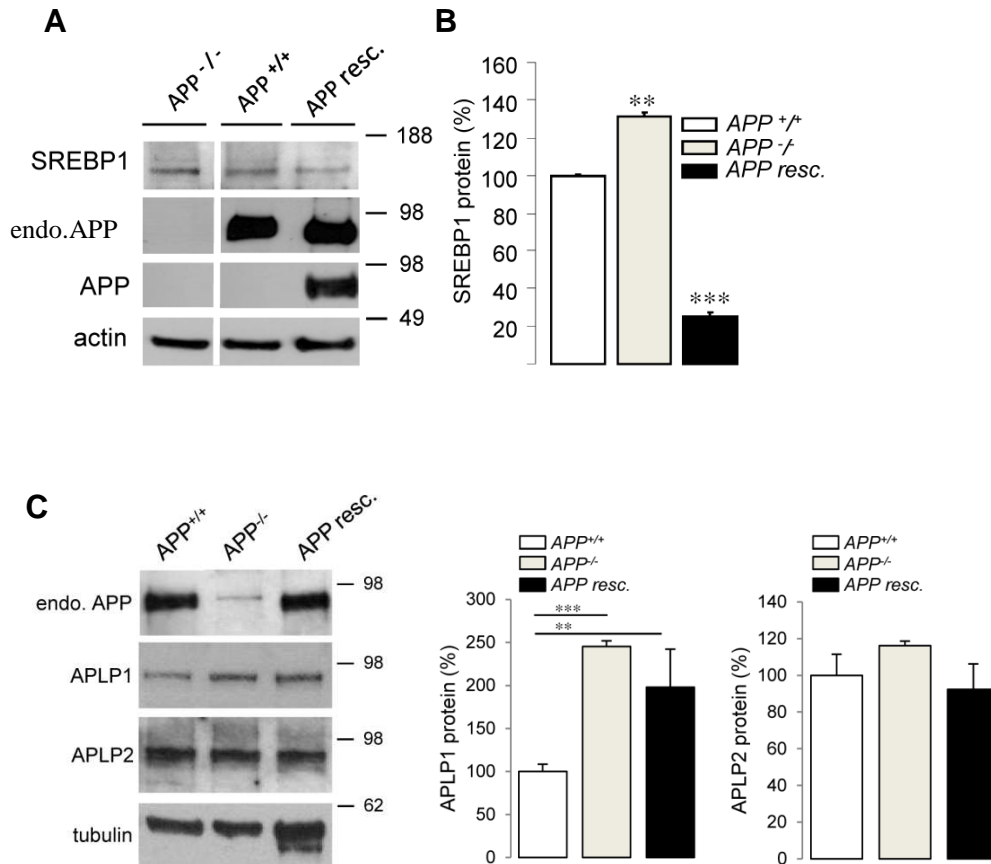

**Supporting information Fig. 3. Knockout of endogenous APP leads to the accumulation of SREBP1.**

**A.** Western blots of cell lysates from primary cultures of mouse cortical neurons prepared from wild type ( $APP^{+/+}$ ),  $APP$  knockout mice ( $APP^{-/-}$ ), and  $APP^{-/-}$  neurons infected by AdhAPP ( $APP resc.$ ).

**B.** Quantification of SREBP1/actin ratios; results were expressed as percentage of  $APP^{+/+}$  (n=3) (\*\* $P < 0.01$ ; \*\*\* $P < 0.001$ ).

**C.** Western blots of cell lysates from primary cultures of mouse cortical neurons prepared from wild type ( $APP^{+/+}$ ),  $APP$  knockout mice ( $APP^{-/-}$ ), and  $APP^{-/-}$  neurons infected by AdhAPP ( $APP resc.$ ) (left panel); quantification of APLP1 and APLP2/tubulin ratios; results were expressed as percentage of  $APP^{+/+}$  (n=3) (\*\* $P < 0.01$ ; \*\*\* $P < 0.001$ ) (right panels).

Supporting information Fig. 4

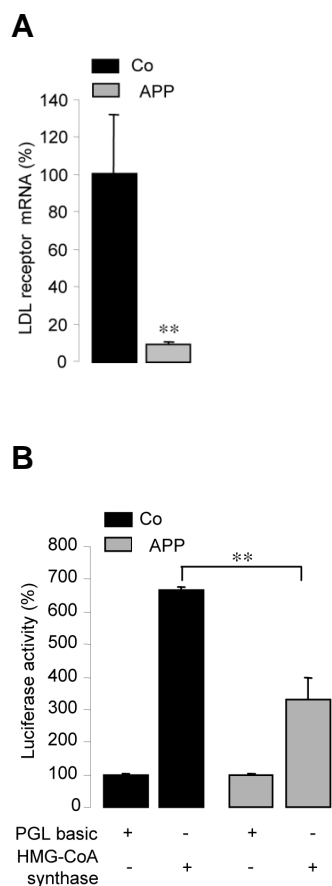

**Supporting information Fig. 4. APP expression down-regulates *LDL receptor* and *HMG-CoA synthase* transcription.**

**A.** Comparative qRT-PCR analysis of *LDL receptor* mRNA in control (Co) and APP expressing neurons. Results (mean  $\pm$  s.e.m, n=6) are normalized by GAPDH mRNA and expressed as percentage of Co.

**B.** The transactivation of the *HMG-CoA synthase* gene promoter fused to a luciferase reporter gene was analysed in a luciferase reporter assay. Control (Co) and APP expressing neurons were transfected with the pGL3 (PGL basic) or pGL2-HMG-CoA synthase luciferase plasmids, and the luciferase activity was measured 48h after transfection. Results (mean  $\pm$  s.e.m, n=3) are expressed as percentage of PGL basic luminescence (\*\* $P < 0.01$ ).

Supporting information Fig.5

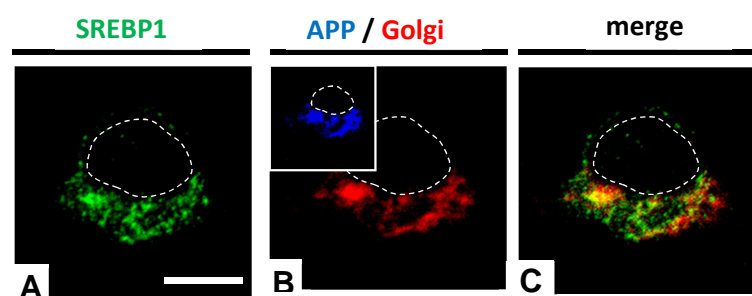

**Supporting information Fig. 5. Full length SREBP1 co-localizes with APP in the Golgi.**

**A-C.** Comparison of the cellular localization of SREBP1 (anti-C-terminus antibody, green), TGN46 (red) and APP (WO2 antibody, blue) in APP-expressing neurons.

**C.** Merged image. Scale bar: 5 $\mu$ m.

Supporting information Fig. 6

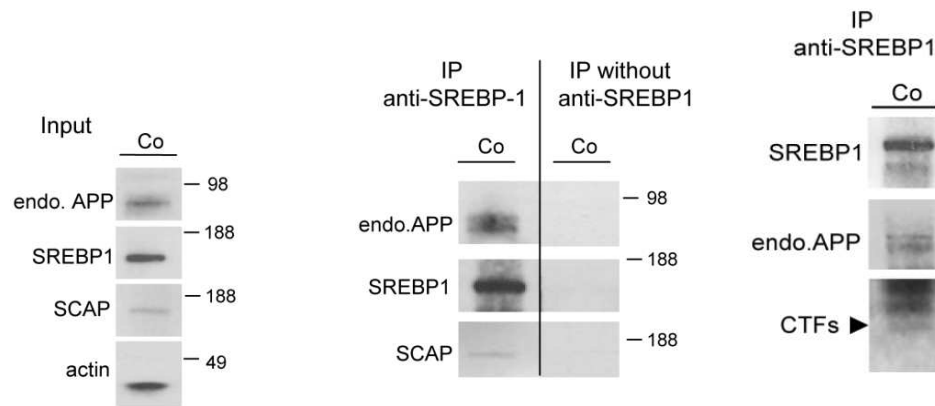

**Supporting information Fig. 6. Endogenous APP and APP CTFs interact with SREBP1.**

Cell lysates from control neurons (Co) were analysed by Western blotting with anti-N-terminus SREBP1, anti-APP C-terminal, for the detection of endogenous APP (endo. APP) and APP carboxy-terminal fragments (CTFs), anti-SCAP, a cargo protein of SREBP1 and anti-actin antibodies (input), or further immunoprecipitated (IP) with or without the anti-Nterminus SREBP1 antibody and analyzed in Western blotting using anti-APP C-terminal, -SCAP or -SREBP1 antibodies.

Supporting information Fig. 7

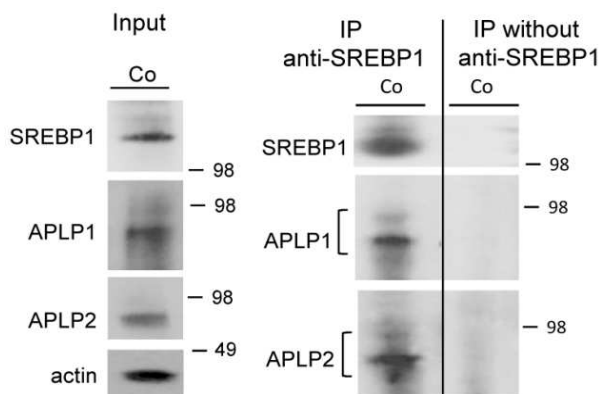

**Supporting information Fig. 7. Endogenous APLP1 and APLP2 interact with SREBP1.**

Cell lysates from control neurons (Co) were analysed by Western blotting with anti-N-terminus SREBP1, anti-APLP1, anti-APLP2 and anti-actin antibodies (input), or further immunoprecipitated (IP) with or without the anti-Nterminus SREBP1 antibody and analyzed in Western blotting.



## Supplementary methods

**Fatty acids synthesis** was measured four days after infection and was performed as described for cholesterol synthesis in the materials and methods section of the paper.

**Cholesterol extraction and assay** were performed as described in the materials and methods section of the paper.

**RNA extraction and real time PCR** were performed as described in the Methods section of the paper. The primers used were the following (**F**, Forward primer; **R**, Reverse primer):

LDL receptor **F**-5'AAGACCACGGAGGACGAGATC3',

**R**-5'CCTCCAGGCTGACCATCTGT3';

GAPDH **F**-5'CCCCAATGTATCCGTTGTG3', **R**-5'TGATTTCCCGTAGGACCGAT3';

### Transient transfection and luciferase activity

Four days after infection, neuronal cultures ( $4 \times 10^5$  cells/cm<sup>2</sup>) were transfected using Lipofectamine 2000 (Invitrogen) with pGL3-Basic luciferase or pGL2-HMG-CoA synthase luciferase plasmids (Demoulin *et al.*, 2004) along with the control *Renilla* luciferase reporter vector (phRG-TK, Promega, Madison, WI) to correct for variations in transfection efficiency. Neurons were transfected with 1 µg of pGL3-Basic or pGL2-HMG-CoA synthase luciferase vectors and 0.17 µg of phRG-TK. Luciferase activity was measured 48 h after transfection with the dual-luciferase assay system (Promega). Luciferase activities are expressed in relative values and represented as percentage of control corresponding to pGL3-Basic alone.

**Immunocytochemical analysis** was performed as described in the experimental procedures section of the paper. Neurons were incubated in the same solution for 1 h at room temperature in the presence of the C20 (1: 100) antibody, directed against the C-terminus of SREBP1 with the WO-2 (1:1.000) antibody together with the sheep polyclonal anti-TGN46 (1: 50) antibody.

### Protein analysis

Cell lysates (10 µg proteins) were analyzed by Western blotting as described in the experimental procedures section of the paper.

## REFERENCE

1. Demoulin JB, Ericsson J, Kallin A, Rorsman C, Ronnstrand L, and Heldin CH (2004) Platelet-derived growth factor stimulates membrane lipid synthesis through activation of phosphatidylinositol 3-kinase and sterol regulatory element-binding proteins. *J Biol Chem*, 279, 35392-35402.
